# Supplementary material
Source: PubMed Central journal article supplement (PMC5556272)

## Appendix - Table of contents

- Detailed protocols
- Appendix Table S1
- Appendix Figure S1

### 3' RACE

Generic RNA-Seq RNA adapters and DNA oligonucleotides are listed here:

<https://support.illumina.com/downloads/illumina-customer-sequence-letter.html>

Mitochondrial RNA-specific primers are listed below.

**RNA preparation and cDNA synthesis.** Total RNA (6 µg) was treated with 20 units of CIAP (Calf Intestinal Alkaline Phosphatase) for 30 minutes at 37 °C. After phenol/chloroform extraction and ethanol precipitation, 5 µg of the CIAP-treated RNA was mixed with 100 pmol of RA3 monophosphorylated RNA adapter, denatured for 2 minutes at 70 °C and placed on ice for 2 minutes. RNA was combined with 40 units of RNase OUT (Invitrogen) and 15 units of T4 RNA ligase 1 (NEB) in 50 µL of 1X buffer T4 RNA ligase with 1 mM ATP, and incubated at 16 °C overnight. After phenol/chloroform extraction and ethanol precipitation, ½ of RNA was used for the reverse transcription reaction with 40 pmol of RTP primer using SuperScript III Reverse Transcriptase per manufacturer's protocol in 20 µL reaction. Upon completion of cDNA synthesis, 1 unit of ribonuclease H was added and incubated for further 20 minutes at 37°C.

**Library construction.** First PCR reaction was performed in a 100 µL of HF buffer, dNTPs (0.2 mM of each), index primer (0.6 µM), primers C654 to C680 (0.02 µM of each), RNase A (Qiagen, 1 µg) and Phusion Hot Start II High Fidelity DNA polymerase (ThermoScientific, 2 units) using the following amplification program:

Initial denaturation: 1 minute at 98°C

98°C - 15 seconds

50°C - 30 seconds

72°C for 15 seconds

5 cycles

98°C - 15 seconds

60°C - 30 seconds

72°C - 15 seconds

5 cycles

Final elongation: 72°C for 5 min

PCR products were purified using the DNA Clean and Concentrator 5 kit (Zymo) and eluted in 20  $\mu$ L of elution buffer.

A second PCR reaction was set-up in a 50  $\mu$ L final volume with 2  $\mu$ L of purified PCR product, HF buffer, 0.2 mM dNTPs, PR1 primer (0.6  $\mu$ M), index primer (0.6  $\mu$ M) and Phusion Hot Start II High Fidelity DNA polymerase (ThermoScientific, 1 units) using the following amplification program:

Initial denaturation: 1 minute at 98°C

98°C - 15 seconds

60°C - 30 seconds

72°C - 15 seconds

16 cycles

Final elongation: 72°C for 5 min

PCR products were purified using the DNA Clean and Concentrator 5 kit (Zymo) and eluted in 8  $\mu$ L of elution buffer.

**Library purification.** PCR products were separated on a 20-cm long, 7.5% non-denaturing acrylamide gel (29:1 acrylamide/Bis-acrylamide, 1xTBE buffer) along with 5  $\mu$ g of Quick-Load 100 bp DNA Ladder (NEB). The gel was stained with SYBR Green I Nucleic Acid Gel Stain and the areas of interest (130 bp to 1 kbp) were cut out under Safe Imager 2, and DNA was extracted into 1 mL of 0.5 M ammonium acetate, 0.1% SDS, 1 mM EDTA overnight at room temperature on a Nutator. Supernatant was collected and concentrated 5-6 times with 2-butanol, and purified DNA was precipitated with ethanol. DNA pellets were resuspended in 50  $\mu$ L of water and re-purified using the DNA Clean and Concentrator 5 kit (Zymo), and eluted in 20  $\mu$ L of elution buffer. Purified library was sequenced either on HiSeq 2500 platform (single-end, 100 bp) or MiSeq platform (paired-end, 300 bp).

### **CLAP-Seq data processing**

The single-end stranded RNA CLAP-Seq raw reads were barcode-separated and adaptor sequences (5'-TGGAATTCTCGGGTGCCAAGG-3') were removed by using Trim-galore ([http://www.bioinformatics.babraham.ac.uk/projects/trim\\_galore/](http://www.bioinformatics.babraham.ac.uk/projects/trim_galore/)) with the default setting. To eliminate nuclear contamination, reads that aligned to the nuclear genome (<http://tritrypdb.org>, release 5.0) by the short read aligner BWA (version 0.7.5) (Li & Durbin, 2009) were eliminated. The filtered reads then were aligned to mitochondrial maxicircle sequences by BWA. The coverage of CLAP-Seq reads on maxicircle were generated by using genomeCoverageBed tool in BEDTools Suite (Quinlan & Hall, 2010).

### **Composite plot for CLAP-Seq relative to transcript end**

Instead of aligning reads onto maxicircle, the trimmed and filtered reads described above were aligned to 20 maxicircle individual transcripts with a 100nt extension downstream of transcript end on the maxicircle. The read coverage on each transcript was calculated using

genomeCoverageBed tool in BEDTools Suites. Then a custom Python script was developed to calculate the average read coverage per base pair when aligned all the transcripts by their transcript end sites from -1000nt to +100nt.

### **Tail length distribution in KPAF3 CLAP-Seq data**

The trimmed and filtered reads described above were aligned to 20 maxicircle individual transcript with a 100nt extension downstream of transcript end on the maxicircle. For each read, if there exists a 3' fragment that is not aligned to the transcript based on the CIGAR string in the alignment SAM file, a custom Python script was used to extract the 3' most unaligned sequences. These sequences were considered as tail sequences bound or protected by KPAF3. The length distribution of all such tail sequences was summarized into a frequency distribution plot by a custom Python script.

### **Whole transcriptome 3' mRNA-Seq data processing**

The adaptor sequences 5'-TGGAATTCTCGGGTGCCAAGG-3' were removed from single-end stranded 300 nt mRNA-Seq raw reads by using Trim-galore with default setting and trimmed reads shorter than 50 nt were also removed. The trimmed reads were aligned to maxicircle and 8 mature sequences of fully edited transcripts with a 100 nt extension after their transcript end from maxicircle sequences by BWA. To extract the tail sequences and locate the exact transcript end site, we selected the alignment which yields a shorter tail sequence from multiple alignments. We then tried to assign the tail type for each 3' tail sequences. If the tail sequences contain >90% U, we define this tail as a U tail. If after removing the longest U stretches in the 5' end, the rest of the tail sequences contain >=90% A, then we define this tail as an A tail. If there is no overhang 3' unaligned sequences, then this transcript belongs to "unmodified" type. And the rest of tail sequences are considered as "other" tail type. For the "other" tail sequences we adopted another round of no-U alignment strategy described in previous literature (Simpson et al., 2016), we removed all U from reads and aligned it to the U-removed 8 fully edited transcripts by Blat(Kent, 2002). If the tail length is shorter based on the no-U alignment strategy compared with U containing alignment, the 3' end location and tail sequences were adjusted based on No-U alignment by custom Python script.

### **Gene-specific 3' mRNA-Seq data processing**

We first merged the paired end RNA-Seq data with PEAR (Zhang et al., 2014). Only the merged pair-end reads were carried into the next step. The adaptor sequences 5'-TGGAATTCTCGGGTGCCAAGG-3' were removed from merged single read by using Trim-galore with default setting and trimmed reads shorter than 50 nt were also removed. The rest of procedures were identical to whole transcriptome 3' mRNA-Seq data Processing as described above.

### **KPAF3 binding motif analysis**

Peak calling on KPAF3 CLAP-Seq was performed on forward and reverse strand of maxicircle separately by MACS (Zhang et al., 2008). Then we only selected the peaks that were detected in both high and low RNase UV+ sample. Then we extended the peak region on both ends to 100nt,

and performed motif detection using MEME algorithm on the stranded mode, with the nucleotide frequency in maxicircle as the background nucleotide frequency (Bailey & Elkan, 1994). We also queried the motif against edited and pre-edited maxicircle transcripts using FIMO with a P value cutoff at 0.001 (Grant et al., 2011).

### **Per base nucleotide composition plot**

FASTQC (<http://www.bioinformatics.babraham.ac.uk/projects/fastqc/>) analysis was performed on KPAF3 trimmed fastq reads.

### References

- Bailey TL, Elkan C (1994) Fitting a mixture model by expectation maximization to discover motifs in biopolymers. *Proceedings. International Conference on Intelligent Systems for Molecular Biology 2*: 28-36
- Grant CE, Bailey TL, Noble WS (2011) FIMO: scanning for occurrences of a given motif. *Bioinformatics 27*: 1017-8
- Kent WJ (2002) BLAT--the BLAST-like alignment tool. *Genome Res 12*: 656-64
- Li H, Durbin R (2009) Fast and accurate short read alignment with Burrows-Wheeler transform. *Bioinformatics 25*: 1754-60
- Quinlan AR, Hall IM (2010) BEDTools: a flexible suite of utilities for comparing genomic features. *Bioinformatics 26*: 841-2
- Simpson RM, Bruno AE, Bard JE, Buck MJ, Read LK (2016) High-throughput sequencing of partially edited trypanosome mRNAs reveals barriers to editing progression and evidence for alternative editing. *Rna 22*: 677-95
- Zhang J, Kobert K, Flouri T, Stamatakis A (2014) PEAR: a fast and accurate Illumina Paired-End reAd mergeR. *Bioinformatics 30*: 614-20
- Zhang Y, Liu T, Meyer CA, Eeckhoute J, Johnson DS, Bernstein BE, Nusbaum C, Myers RM, Brown M, Li W, Liu XS (2008) Model-based analysis of ChIP-Seq (MACS). *Genome Biol 9*: R137

**Appendix Table S1. DNA Constructs and T7 Transcription**

| Name | Sequence, 5'-3'                                                                                               | Description                                       |
|------|---------------------------------------------------------------------------------------------------------------|---------------------------------------------------|
| B876 | GGTAATACGACTCACTATAGGGAACCCTTTGTTTTGGTT<br>AAAGAAACATCGTTTAGAAGAGATTTTAGAATAAGATA<br>TGTTTTTAATATTTTTTTTA     | T7 transcription<br>RPS12 pre-cursor<br>sense     |
| B877 | ATAATCAAAAACCTTAGAAAATTCCTACCAAACATAAAT<br>GAACCTGATATAAACCCAAACATTATAAAAAATAAAAA<br>AAATATTAAAAACATATCTTATTC | T7 transcription<br>RPS12 pre-cursor<br>antisense |
| A717 | TGGAAGCTTAACGCGTAAAGGAATTGGTGGAGGAAC                                                                          | Sense, KPAF3 RNAi                                 |
| A718 | AGGTCTAGAACTTTCCAGCCTTGAGCAAAGGGTAC                                                                           | Antisense, KPAF3 RNAi                             |
| B85  | CGCAAGCTTATGAACTACTGCGACGAGGGA                                                                                | Sense, KPAF3 MHTAP                                |
| B86  | GCGTCTAGAATGTGCACGATCATCTGCACCCA                                                                              | Antisense, KPAF3<br>MHTAP                         |
| B72  | GCACATATGATGAACTACTGCGACGAGGG                                                                                 | Sense, KPAF3 in pET28                             |
| B73  | GGCAAGCTTTTAATGTGCACGATCATCTGCAC                                                                              | Antisense, KPAF3 in<br>pET28                      |

**3' RACE primers**

P: pre-edited, E: edited.

| Name | Sequence, 5'-3'                                            | Description |
|------|------------------------------------------------------------|-------------|
| C652 | G TTCAGAGTTCTACAGTCCGACGATCCTACTTATTA<br>CCATGATTGATTG TTC | 3RACE 12S   |
| C653 | G TTCAGAGTTCTACAGTCCGACGATCGGATTATAA<br>ATTGAAAGTGGTAATATC | 3RACE 9S    |
| C654 | G TTCAGAGTTCTACAGTCCGACGATCATTTTTGCCA<br>ACGCATTC          | 3RACE ND8p  |
| C655 | G TTCAGAGTTCTACAGTCCGACGATCGTAGGGAAG<br>AAACATCGAGG        | 3RACE ND9p  |
| C656 | G TTCAGAGTTCTACAGTCCGACGATCCATATCTGGC<br>ATTTAATTTGAC      | 3RACE MURF5 |
| C657 | G TTCAGAGTTCTACAGTCCGACGATCACCCCAAAG<br>GGATTTGAG          | 3RACE ND7p  |
| C658 | G TTCAGAGTTCTACAGTCCGACGATCAAGGAATAC<br>AATTTGCAGAGG       | 3RACE CO3p  |
| C659 | G TTCAGAGTTCTACAGTCCGACGATCTTTATAGTAT<br>ATGAATGAGTGG      | 3RACE CYB   |
| C660 | G TTCAGAGTTCTACAGTCCGACGATCATGGAATTG<br>GGAATTGCC          | 3RACE A6p   |

|      |                                                                      |                                            |
|------|----------------------------------------------------------------------|--------------------------------------------|
| C661 | G TTCAGAGTTCTACAGTCCGACGATCTTTCTTATCA<br>ATTCTTGG                    | 3RACE MURF1                                |
| C662 | G TTCAGAGTTCTACAGTCCGACGATCGGGTTTAGG<br>GACAGAGGG                    | 3RACE CR3p                                 |
| C663 | G TTCAGAGTTCTACAGTCCGACGATCCTTATACCAC<br>GTGTTATATGC                 | 3RACE ND1                                  |
| C664 | G TTCAGAGTTCTACAGTCCGACGATCGTAGAGAAC<br>CTGGTAGGTG                   | 3RACE CO2                                  |
| C665 | G TTCAGAGTTCTACAGTCCGACGATCTATTTTGATA<br>TATTCGGATC                  | 3RACE MURF2p                               |
| C666 | G TTCAGAGTTCTACAGTCCGACGATCATGAGTACC<br>AGTTTGTATGG                  | 3RACE CO1                                  |
| C667 | G TTCAGAGTTCTACAGTCCGACGATCGGTTTTAGTT<br>GGGGAGAAAG                  | 3RACE CR4p                                 |
| C668 | G TTCAGAGTTCTACAGTCCGACGATCTATTCATTTG<br>TATGGTTGG                   | 3RACE ND4                                  |
| C669 | G TTCAGAGTTCTACAGTCCGACGATCATGGGAGAT<br>GGGTTTTGG                    | 3RACE ND3p                                 |
| C670 | G TTCAGAGTTCTACAGTCCGACGATCGAACCGACG<br>GAGAGCTT                     | 3RACE RPS12p                               |
| C671 | G TTCAGAGTTCTACAGTCCGACGATCGATTGCATA<br>ATGTTGTTTTGG                 | 3RACE ND5                                  |
| C672 | G TTCAGAGTTCTACAGTCCGACGATCTATTTATTGG<br>CGCCCAAG                    | 3RACE ND8e                                 |
| C673 | G TTCAGAGTTCTACAGTCCGACGATCCCATTATTTG<br>GTTTGTTTGTATTG              | 3RACE ND9e                                 |
| C674 | G TTCAGAGTTCTACAGTCCGACGATCGGATGTTTGT<br>TTGCGTGG                    | 3RACE ND7e                                 |
| C675 | G TTCAGAGTTCTACAGTCCGACGATCTTGTGTATGG<br>ATACACGTTTTG                | 3RACE CO3e                                 |
| C676 | G TTCAGAGTTCTACAGTCCGACGATCTGATTTTGCA<br>GTTGATAATGG                 | 3RACE A6e                                  |
| C677 | G TTCAGAGTTCTACAGTCCGACGATCAATATGGGTT<br>TATTGTTGTGTTA               | 3RACE CR3e                                 |
| C678 | G TTCAGAGTTCTACAGTCCGACGATCTGTTTTTTGT<br>TTTGGGTGG                   | 3RACE CR4e                                 |
| C679 | G TTCAGAGTTCTACAGTCCGACGATCTGTATGTATA<br>GGATTTGTGTGG                | 3RACE ND3e                                 |
| C680 | G TTCAGAGTTCTACAGTCCGACGATCTTTTGTTTTGG<br>ATGTTGCG                   | 3RACE RPS12e                               |
| B863 | AATGATACGGCGACCACCGAGATCTACACGTTTCAG<br>AGTTCTACAGTCCGA              | forward primer for<br>library construction |
| B864 | CAAGCAGAAGACGGCATAACGAGATCGTGATGTGAC<br>TGGAGTTCCTTGGCACCCGAGAATTCCA | reverse primer for<br>library construction |

**Appendix Figure S1. KPAF3 binding correlates with downstream adenylation events.**

Adenylated, uridylated and unmodified 3' ends of unedited mitochondrial mRNAs were mapped along with KPAF3 CLAP-Seq reads onto maxicircle DNA and fully-edited mRNA sequences where applicable. Gene positions are shown by arrows.

# Unedited mRNAs

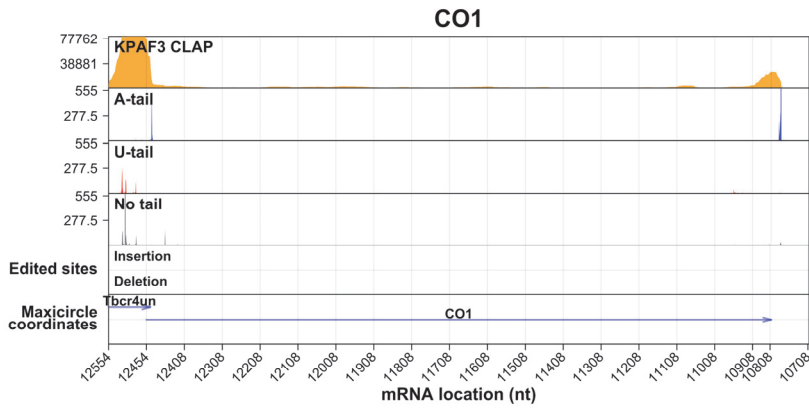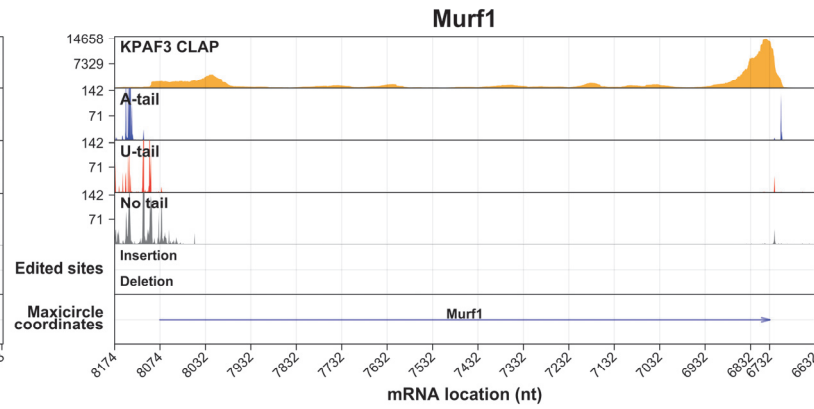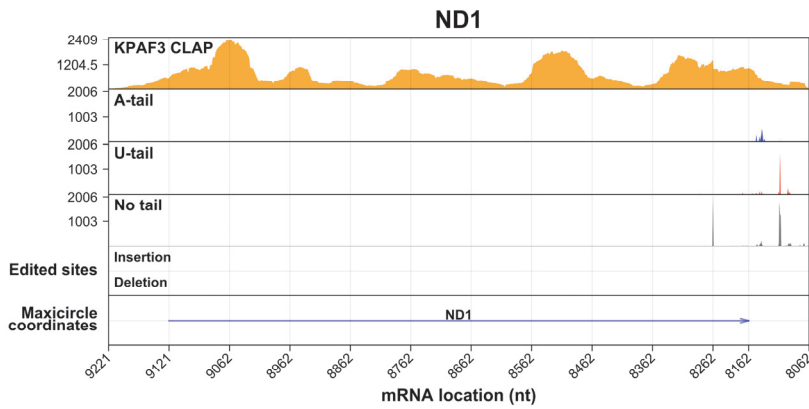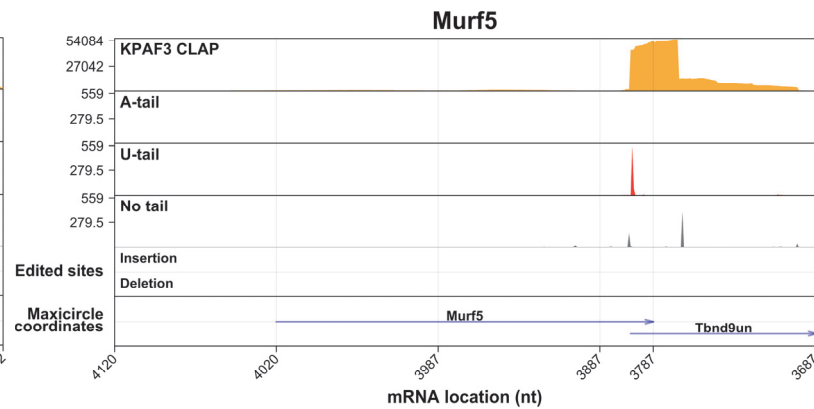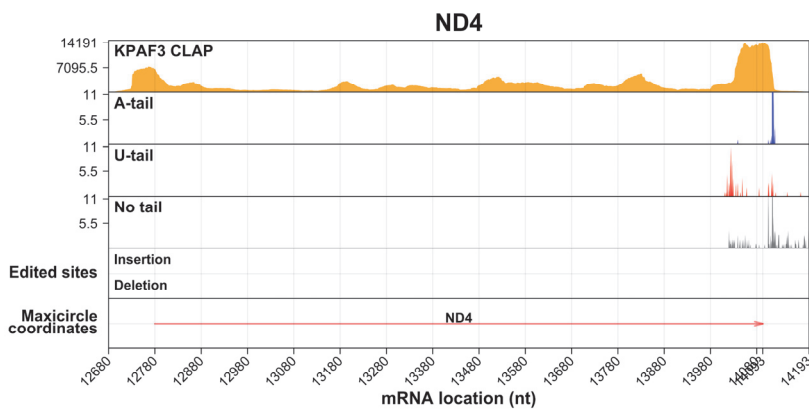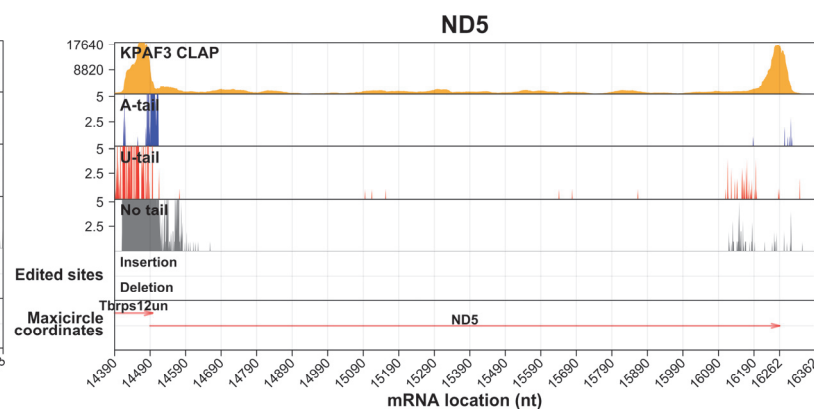



# Moderately-edited mRNAs

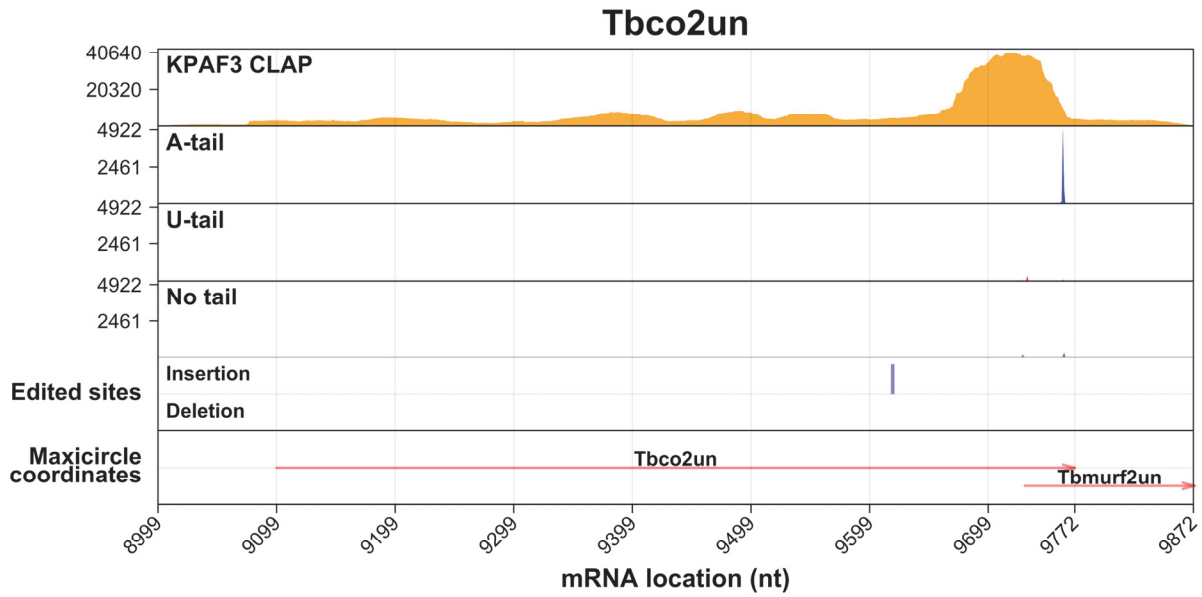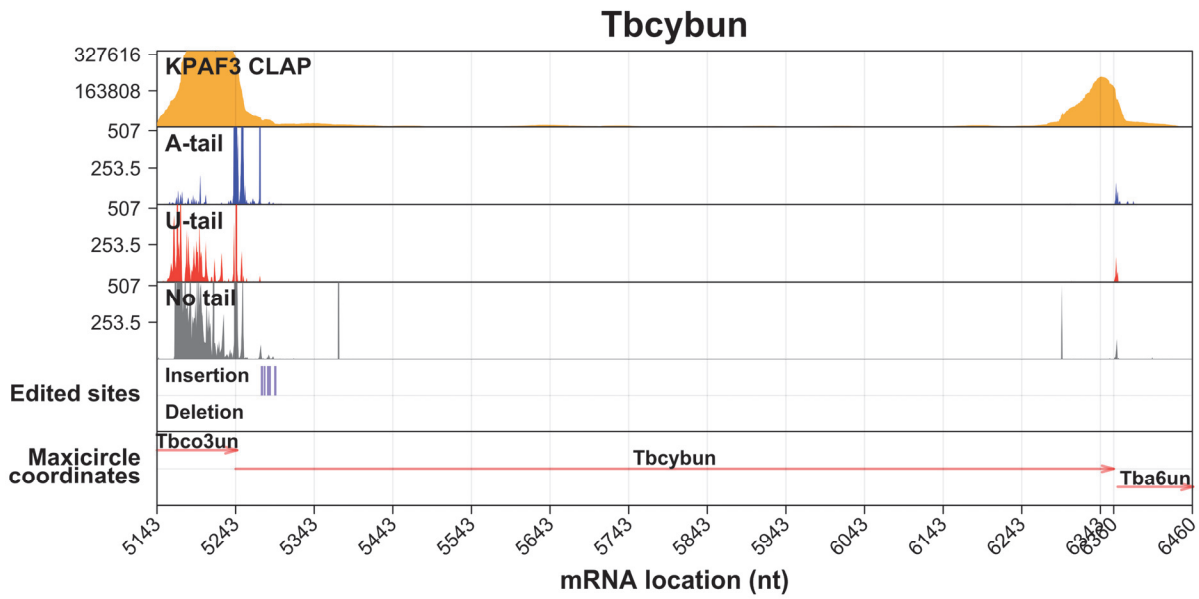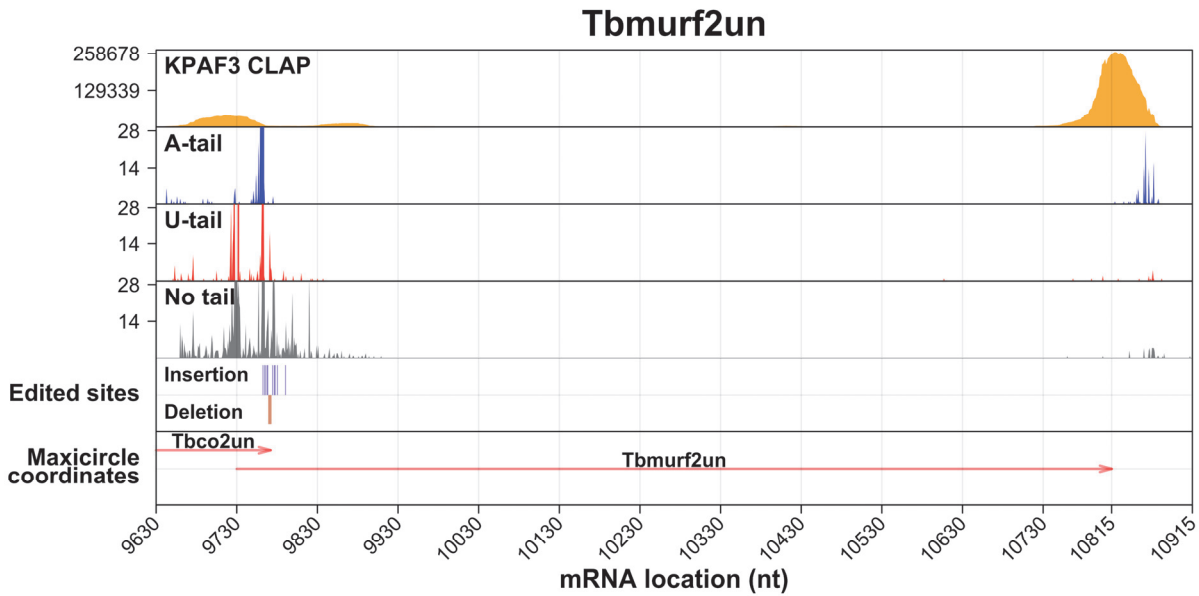

# Pan-edited mRNAs

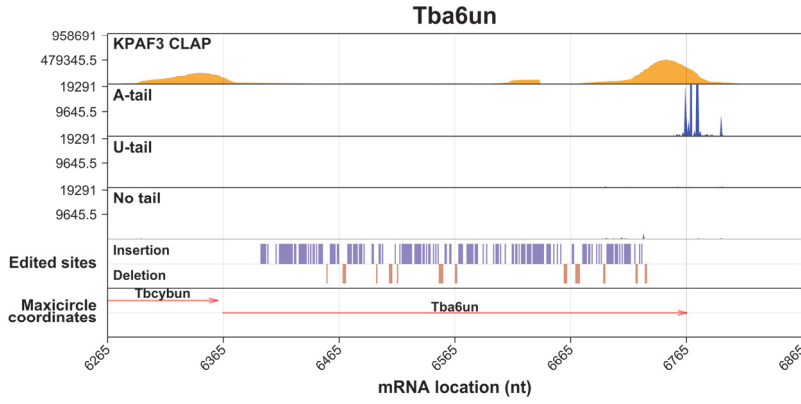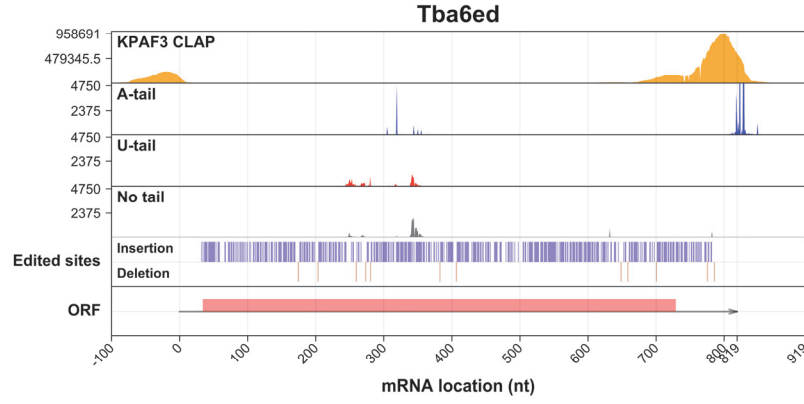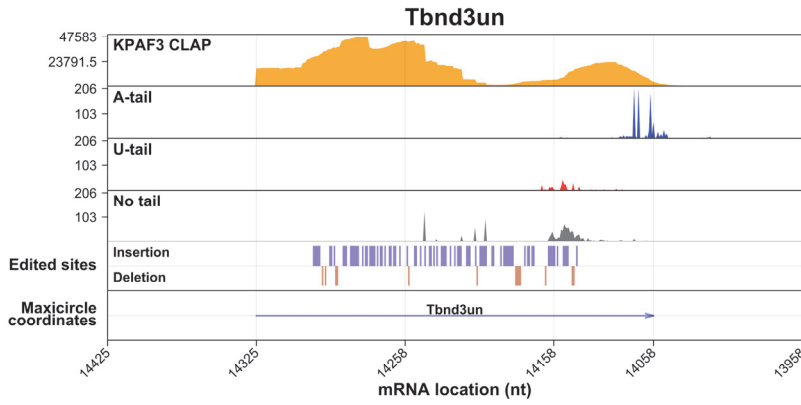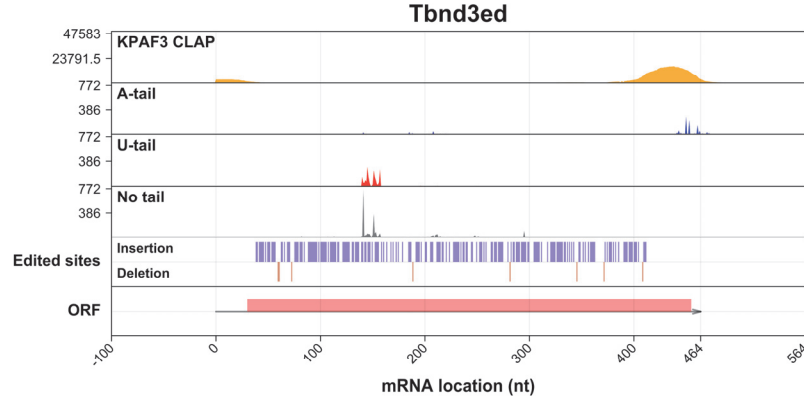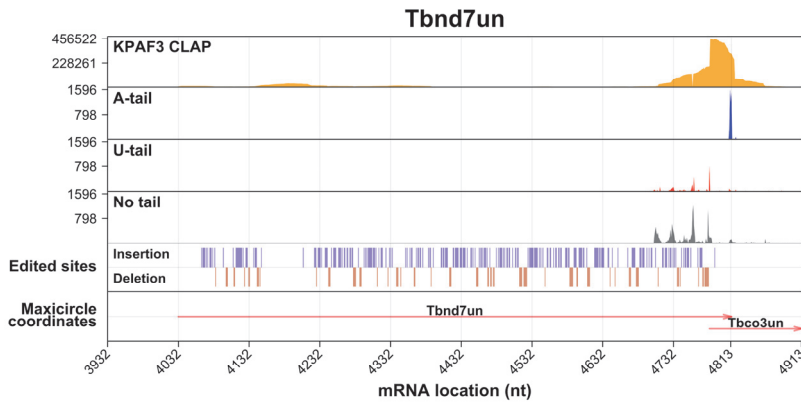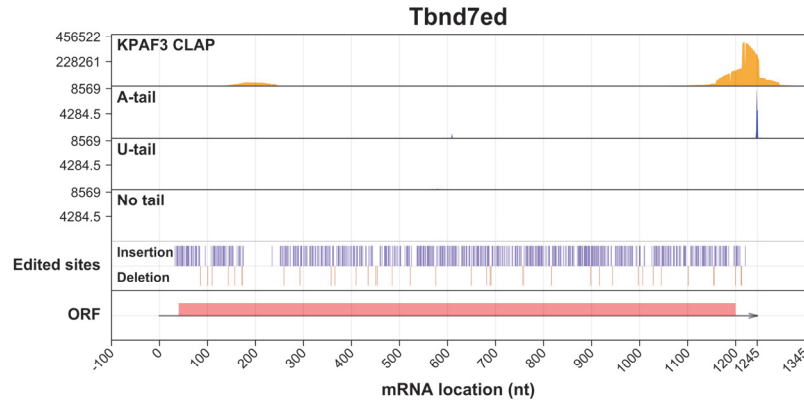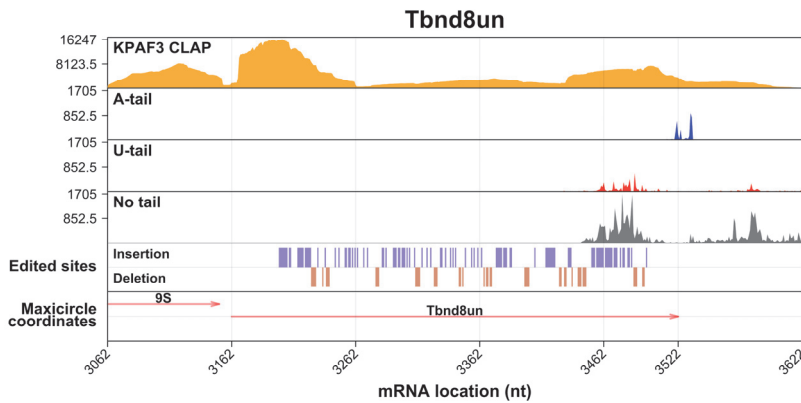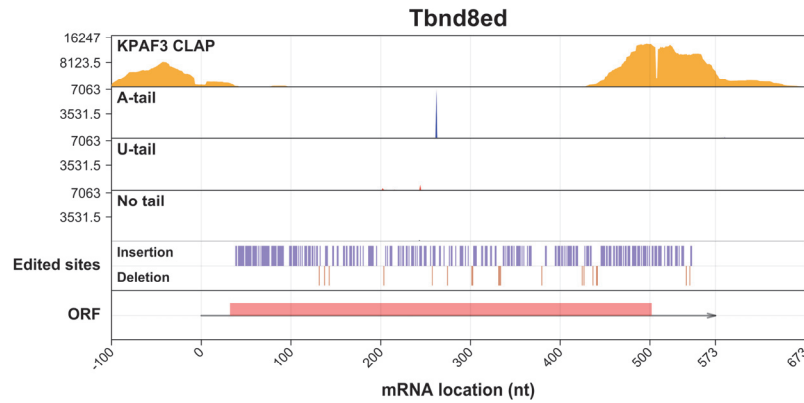

# Pan-edited mRNAs

## Tbnd9un

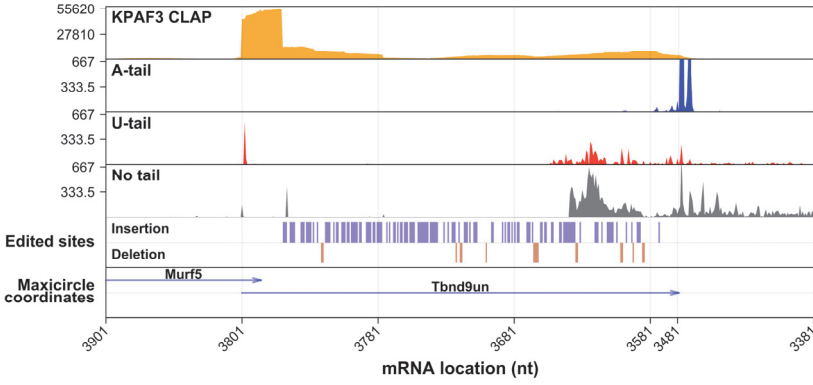

## Tbnd9ed

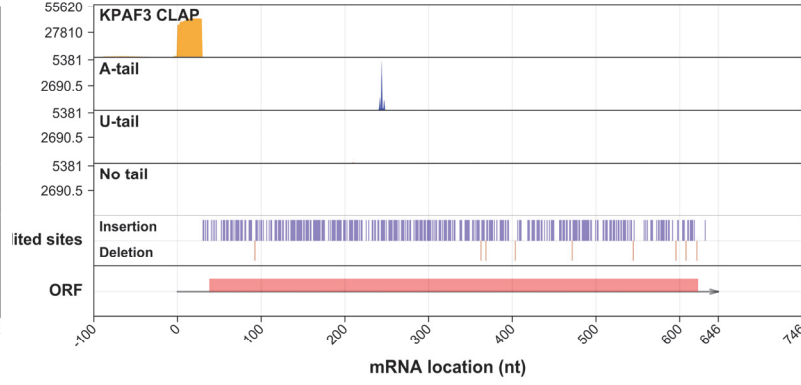

## Tbrps12un

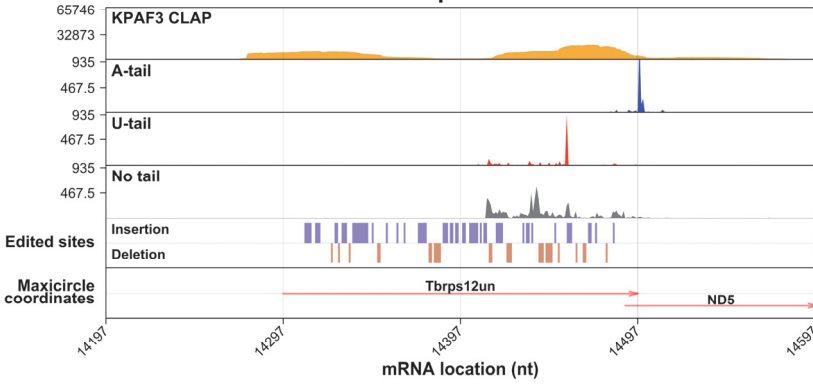

## Tbrps12ed

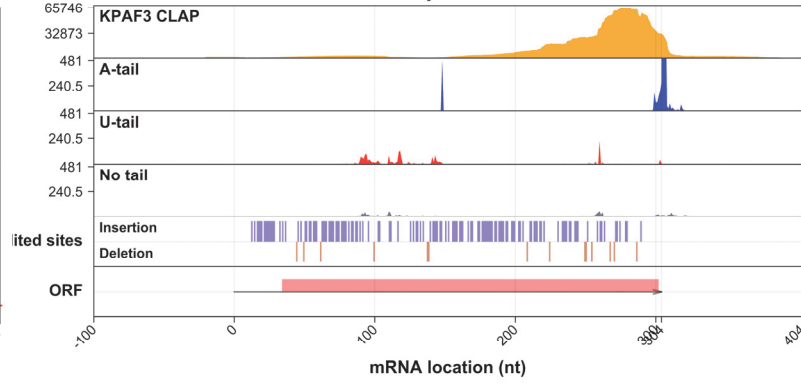

## Tbco3un

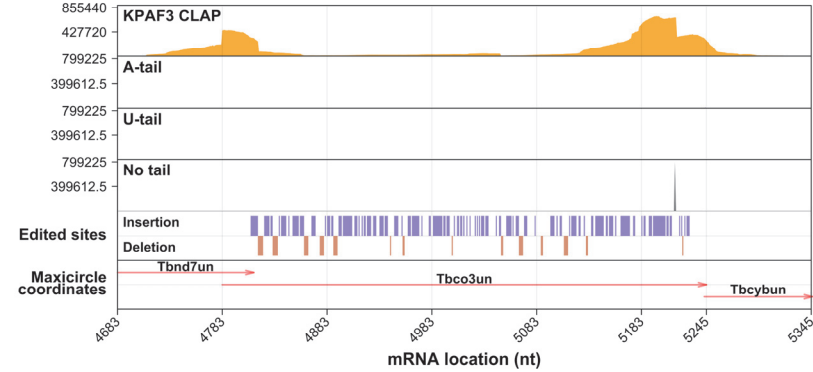

## Tbco3ed

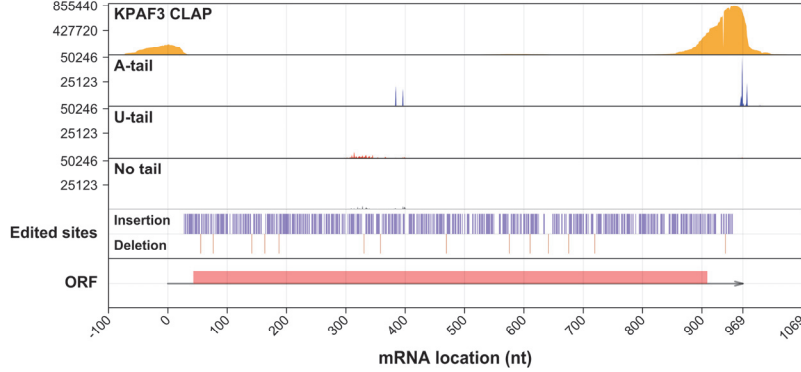

Supplement: EMBJ-36-2435-s001.pdf [file EMBJ-36-2435-s001.pdf]
