# Supplementary material
Source: PubMed Central journal article supplement (PMC5556272)

Figure 1 source data

**Panel D**  
Sypro Ruby-stained SDS gel

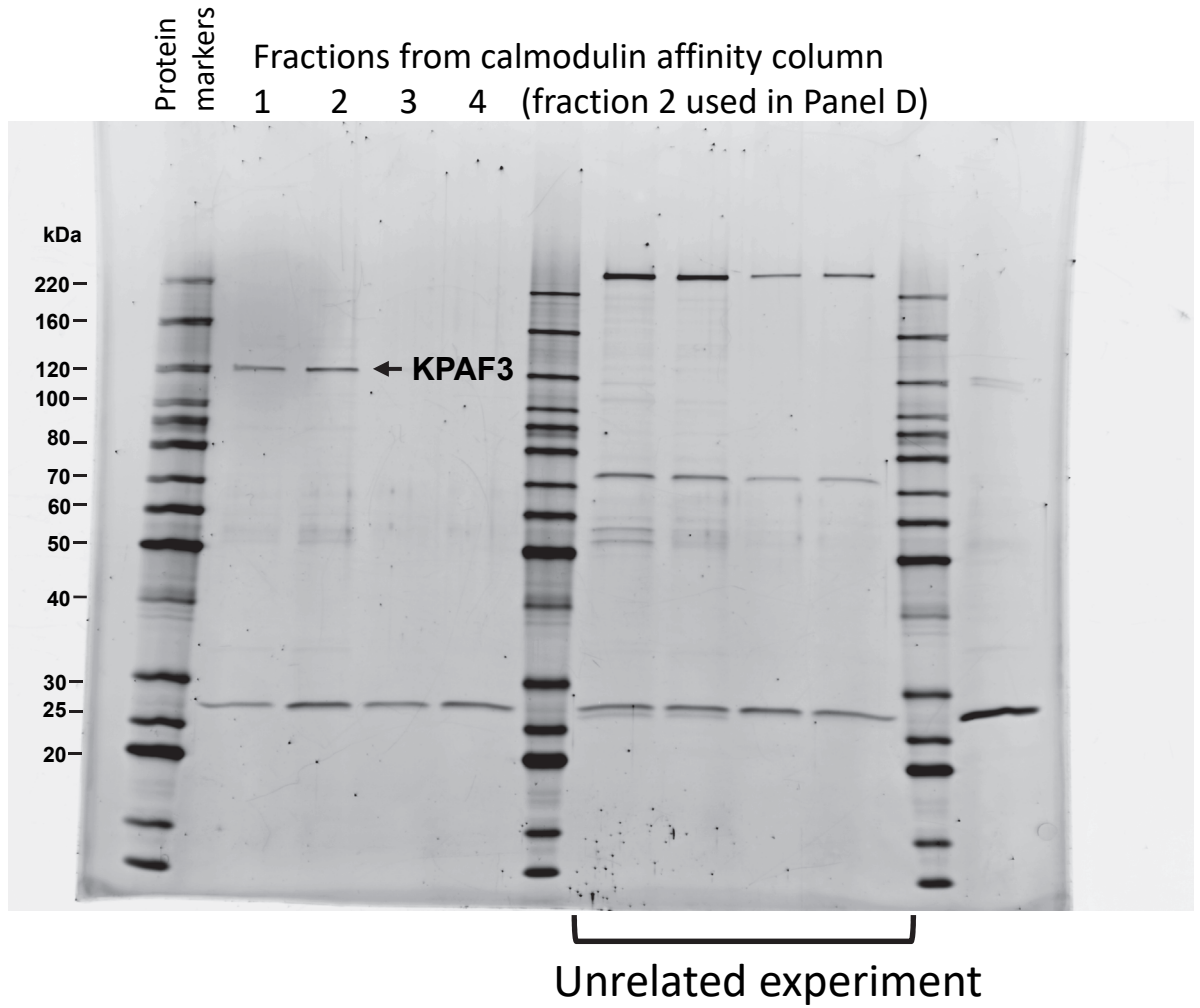

**Panel E**  
Western blot

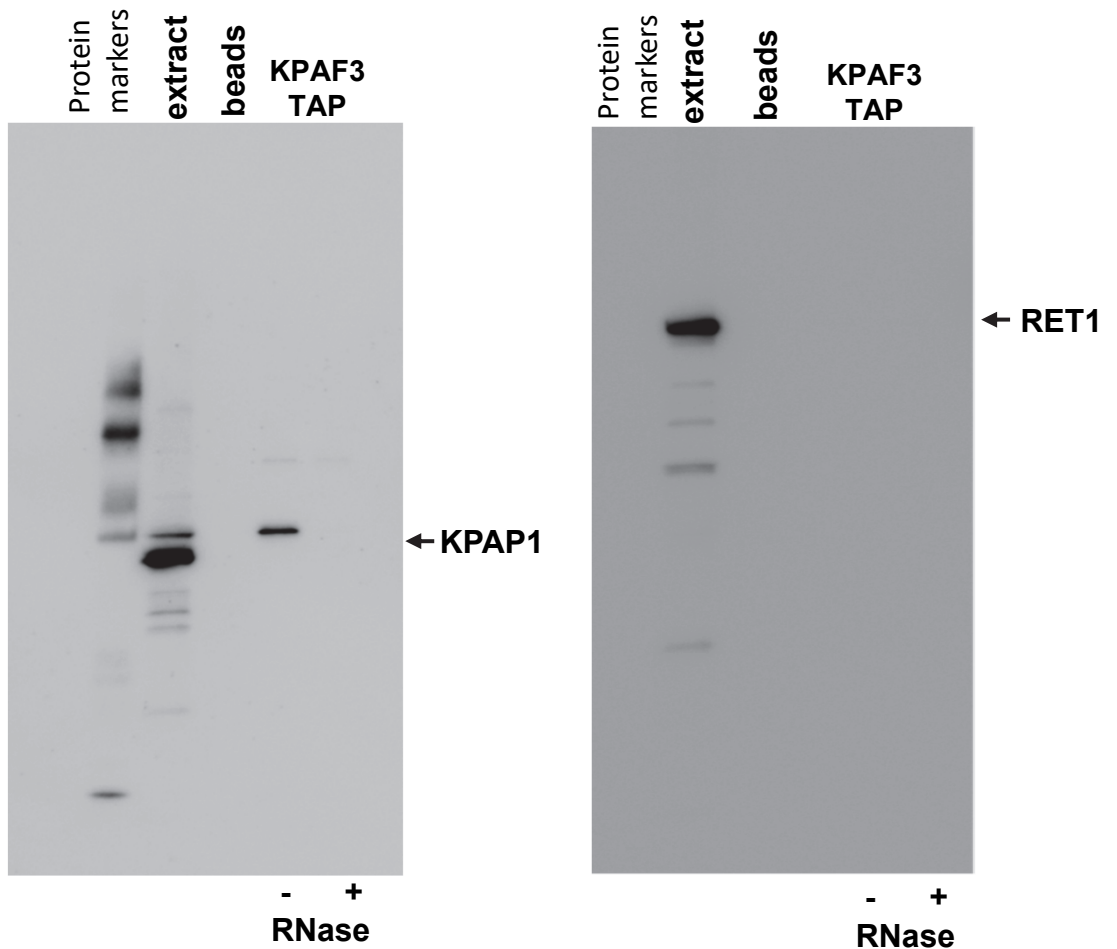

Supplement: EMBJ-36-2435-s007.pdf [file EMBJ-36-2435-s007.pdf]

Figure 2 source data (Panel A)

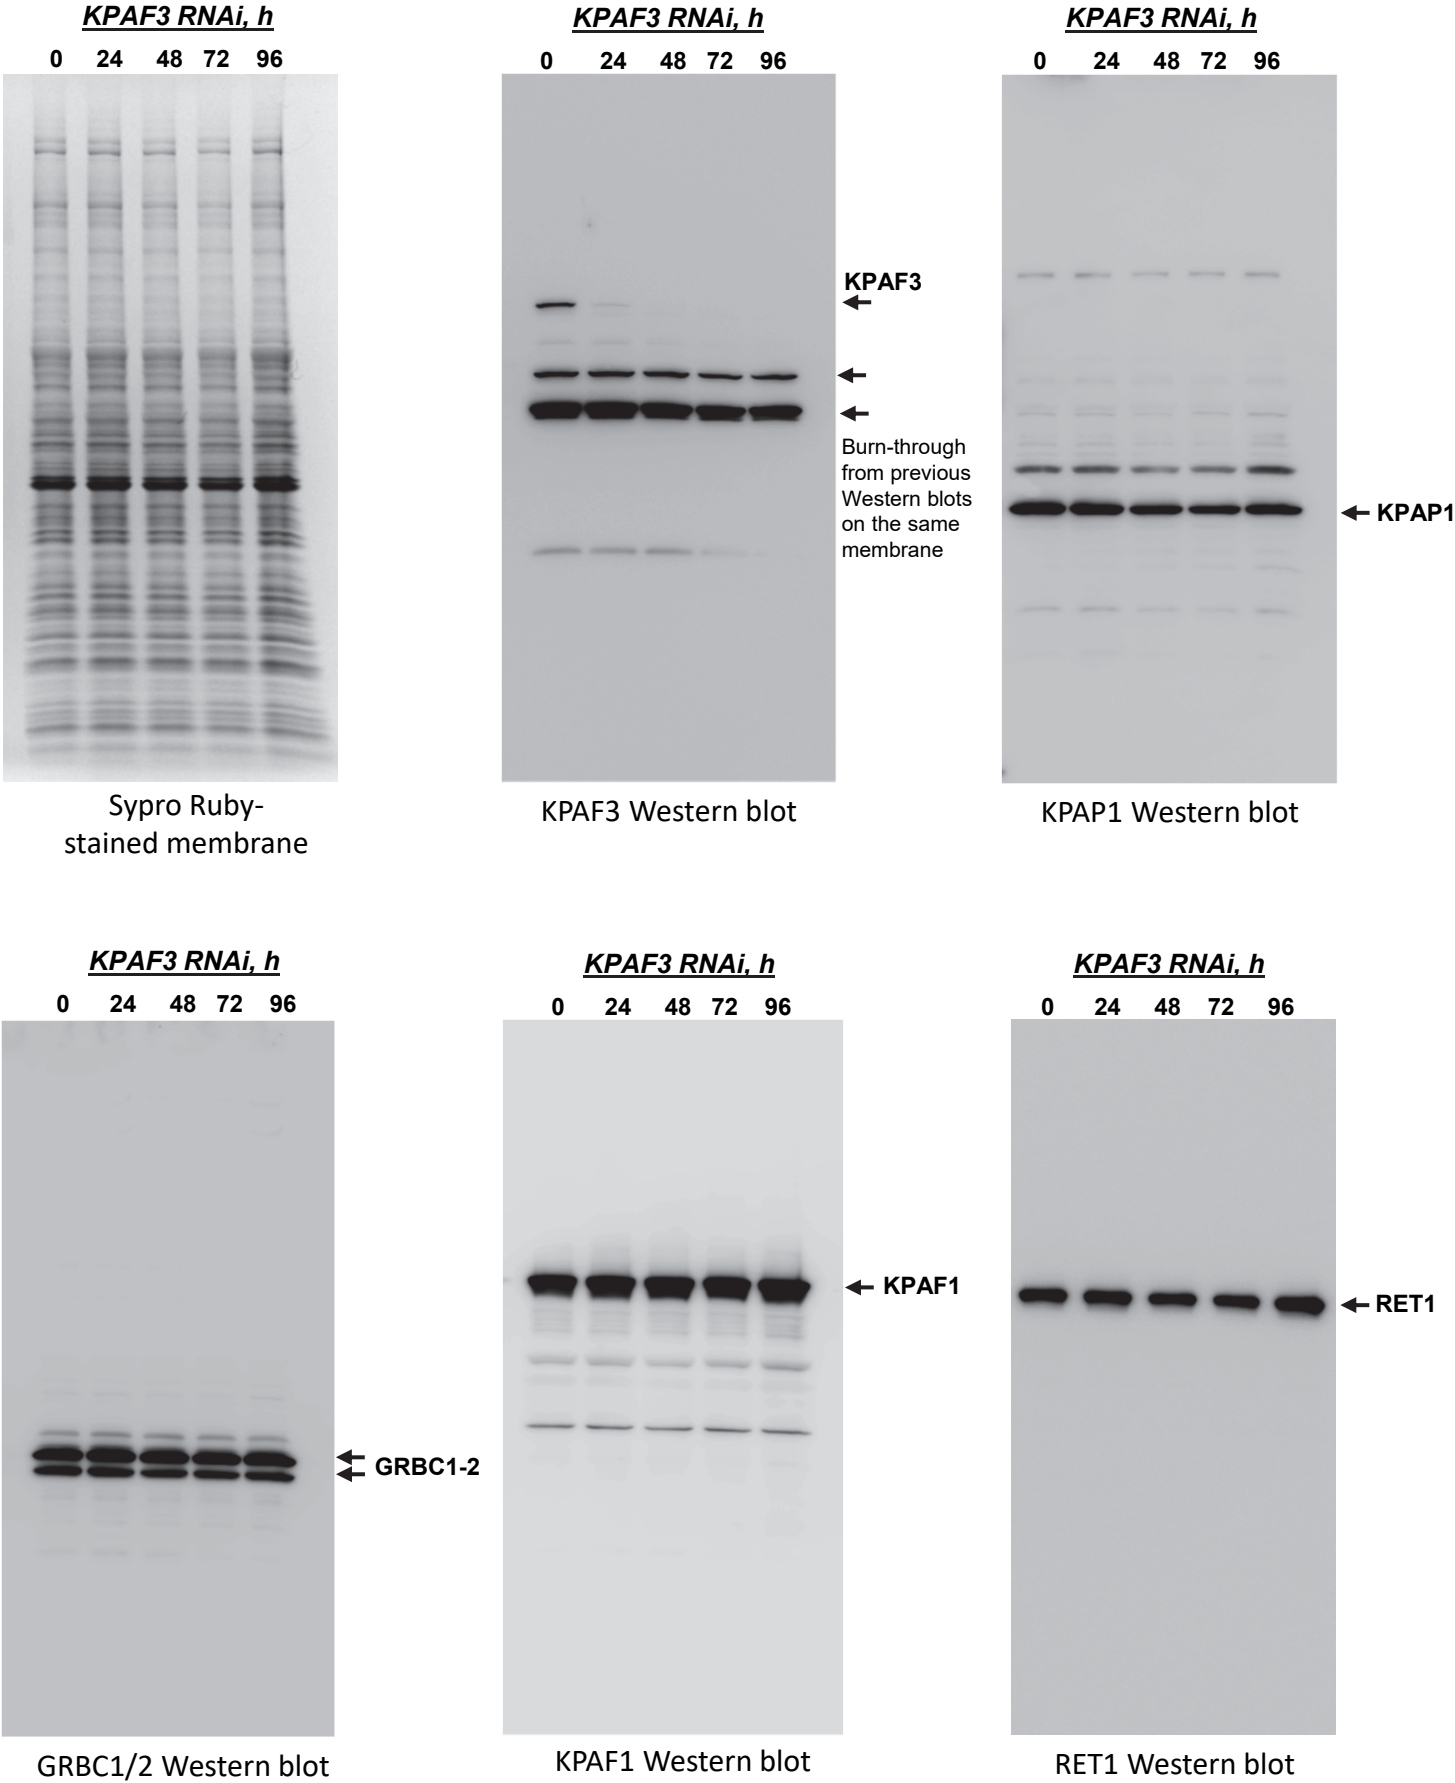

Supplement: EMBJ-36-2435-s008.pdf [file EMBJ-36-2435-s008.pdf]

Figure 7 source data (Panel C)

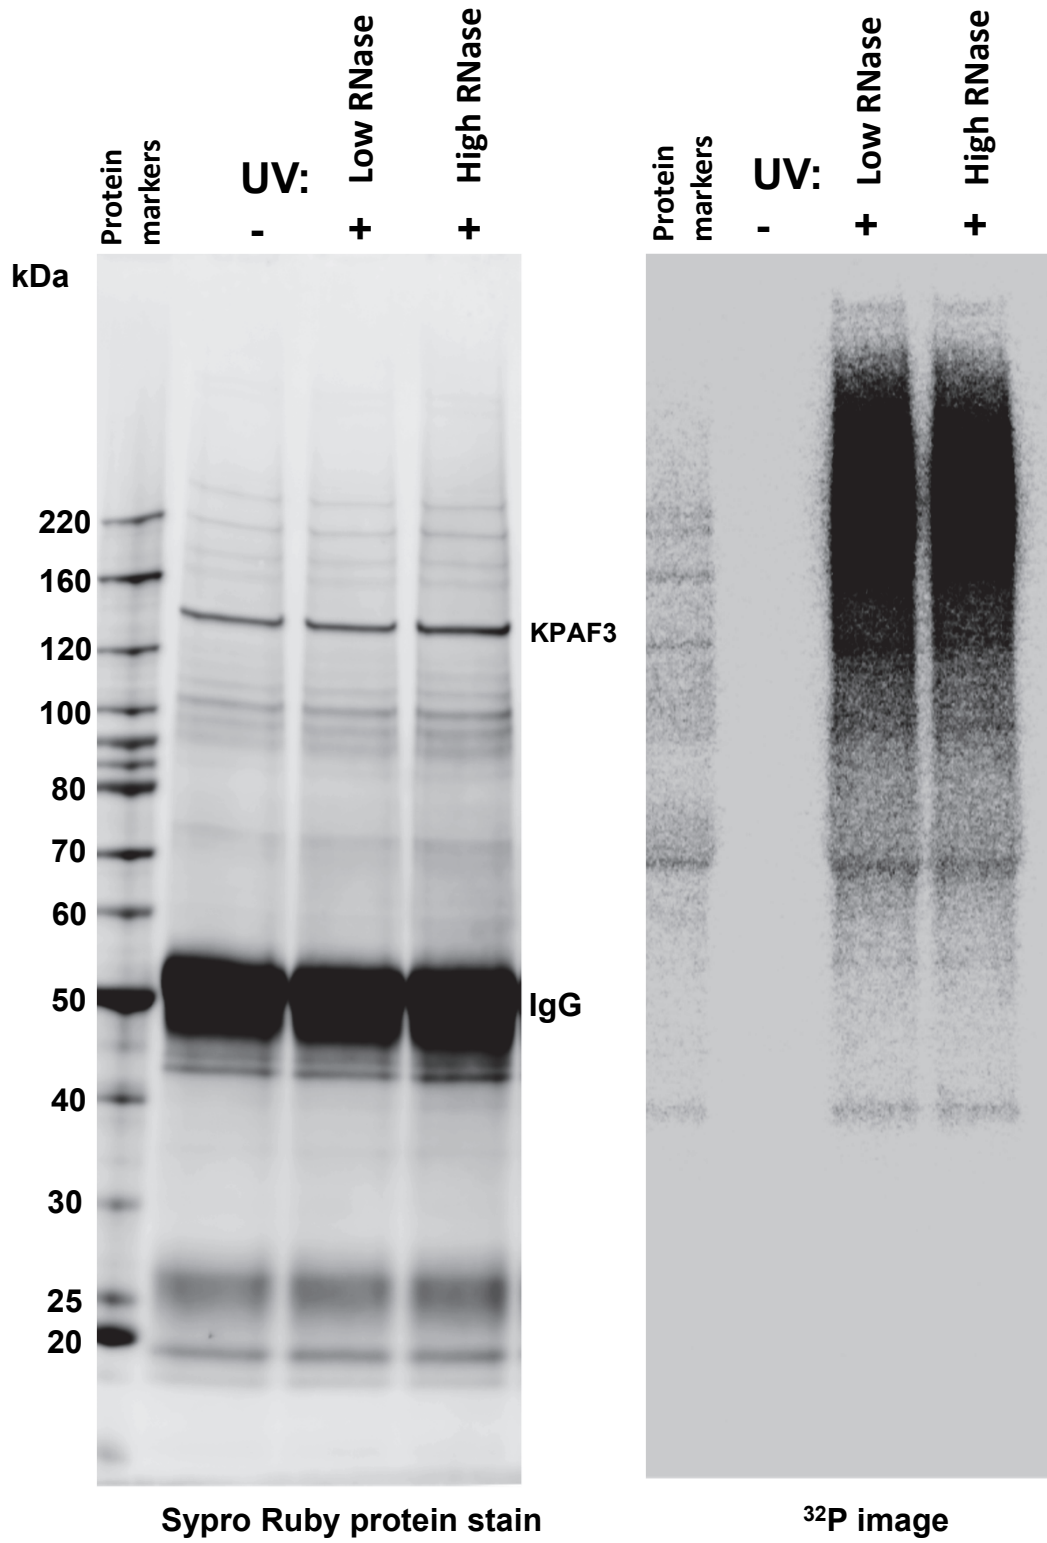

Supplement: EMBJ-36-2435-s009.pdf [file EMBJ-36-2435-s009.pdf]
